# Supplementary material
Source: publisher figshare collection journal article supplement (https://frontiersin.figshare.com/ndownloader/files/22672376)
Supplement: Supplementary file 1 [file 22672376]

## Supplementary Material

### Zn-Fe double hydroxide-carbon nanotube anodes for asymmetric supercapacitors

Wenyu Liang, Igor Zhitomirsky\*

Department of Materials Science and Engineering, McMaster University, Hamilton, Ontario, Canada

\* **Correspondence:**

Corresponding Author  
zhitom@mcmaster.ca

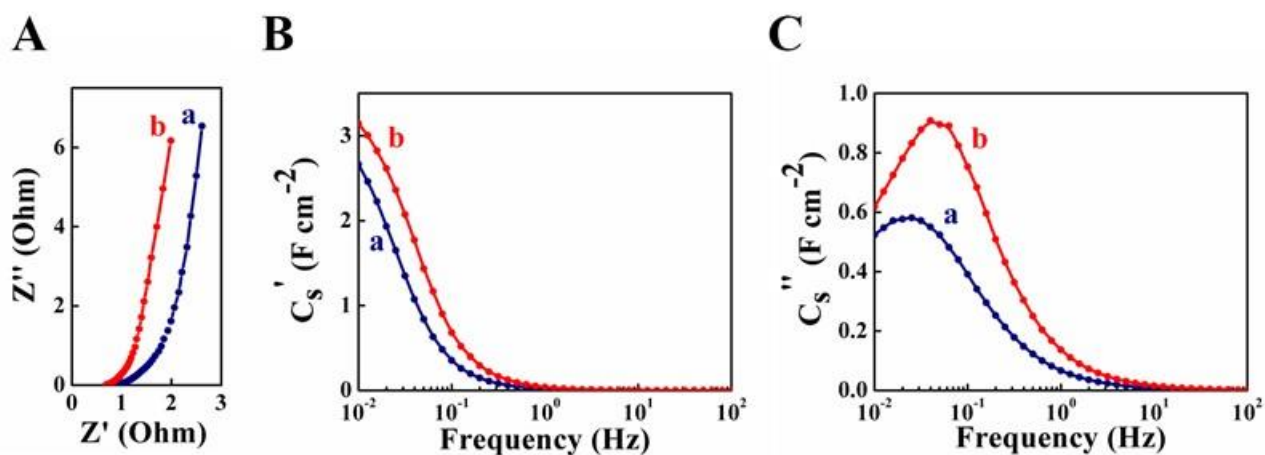

Figure S1. (A) Nyquist plot of complex impedance and (B,C) frequency dependence of complex capacitances (B)  $C_s'$  and (C)  $C_s''$  for (a) ZnFe-CNT and (b) ZnFeCB-CNT.
